# Supplementary material for: Comparative genomic analysis of Flavobacteriaceae: insights into carbohydrate metabolism, gliding motility and secondary metabolite biosynthesis
Source: Springer Nature journal article supplement (doi:10.1186/s12864-020-06971-7), 2020-08-20
Supplement: MOESM2 [file 12864_2020_6971_MOESM2_ESM.pdf]

Additional File 2. Publicly available genomes used in this study (Source: <https://gold.jgi.doe.gov/>).

| IMG Genome Name / Sample Name                        | IMG Genome ID | Sequencing Status | Genome size (bp) | Gene Count | 16SrRNA GenBank accession number | Isolation source |
|------------------------------------------------------|---------------|-------------------|------------------|------------|----------------------------------|------------------|
| <i>Algibacter wandonensis</i> CECT 8301              | 2772190795    | Draft             | 4,707,503        | 4004       | KC987358                         | sediment         |
| <i>Alteromonas macleodii</i> ATCC 27126              | 2554235747    | Finished          | 4,653,851        | 3941       | CP003841                         | seawater         |
| <i>Anabaena</i> sp. PCC 7108                         | 2506485002    | Permanent Draft   | 5,886,741        | 5227       | AJWF01000009                     | seawater         |
| <i>Arenibacter echinorum</i> DSM 23522               | 2593339296    | Permanent Draft   | 5,193,588        | 4393       | EF536748                         | sea urchin       |
| <i>Bizionia echini</i> DSM 23925                     | 2622736504    | Draft             | 3,314,721        | 3072       | FJ716799                         | sea urchin       |
| <i>Candidatus Pelagibacter ubique</i> SAR11 HTCC1062 | 637000058     | Finished          | 1,308,759        | 1394       | CP000084                         | seawater         |
| <i>Cellulophaga fucicola</i> DSM 24786               | 2595699004    | Draft             | 3,922,041        | 3495       | AJ005973                         | algae            |
| <i>Cellulophaga lytica</i> LIM-21, DSM 7489          | 649633032     | Finished          | 3,765,936        | 3358       | AB517706                         | sediment         |
| <i>Cellulophaga tyrosinoxydans</i> DSM 21164         | 2595698249    | Permanent Draft   | 3,555,791        | 3209       | EU443205                         | seawater         |
| <i>Crocospaera watsonii</i> WH 8501                  | 2623620439    | Draft             | 6,291,599        | 6836       | AADV02000003                     | seawater         |
| <i>Dokdonia pacifica</i> DSM 25597                   | 2724679821    | Draft             | 5,520,745        | 4968       | KP862606                         | seawater         |
| <i>Dokdonia</i> sp. PRO95                            | 2597489917    | Finished          | 3,305,093        | 3038       | FJ627052                         | seawater         |
| <i>Eudoraea adriatica</i> DSM 19308                  | 2522572201    | Permanent Draft   | 3,906,474        | 3579       | AM745437                         | seawater         |
| <i>Flavobacterium branchiophilum</i> FL-15           | 2561511155    | Finished          | 3,563,292        | 2925       | FQ859183                         | fish pathogen    |
| <i>Flavobacterium columnare</i> ATCC 49512           | 2511231122    | Finished          | 3,162,865        | 2735       | CP003222                         | fish pathogen    |
| <i>Flavobacterium indicum</i> GPTSA100-9             | 2540341066    | Finished          | 2,993,089        | 2738       | HE774682                         | spring water     |
| <i>Flavobacterium johnsoniae</i> UW101, ATCC 17061   | 644736369     | Finished          | 6,096,872        | 5099       | CP000685                         | soil/freshwater  |
| <i>Flavobacterium psychrophilum</i> JIP02/86         | 640753027     | Finished          | 2,861,988        | 2505       | AM398681                         | fish pathogen    |
| <i>Formosa agariphila</i> KMM 3901                   | 2585427664    | Permanent Draft   | 4,228,350        | 3630       | AY187688                         | algae            |

|                                                |            |                    |           |      |          |                |
|------------------------------------------------|------------|--------------------|-----------|------|----------|----------------|
| <i>Formosa spongicola</i> DSM 22637            | 2595698203 | Permanent<br>Draft | 3,155,334 | 2961 | FJ348469 | sponge         |
| <i>Gaetbulibacter saemankumensis</i> DSM 17032 | 2524614665 | Permanent<br>Draft | 3,089,149 | 2746 | AY883937 | sediment       |
| <i>Galbibacter marinus</i> ck-l2-15            | 2519899576 | Permanent<br>Draft | 3,572,447 | 3138 | EU928746 | sediment       |
| <i>Idiomarina loihiensis</i> GSL 199           | 2554235415 | Finished           | 2,839,759 | 2717 | CP005964 | seawater       |
| <i>Imtechella halotolerans</i> K1              | 2534681666 | Permanent<br>Draft | 3,086,951 | 2734 | FR774044 | brackish water |
| <i>Joostella marina</i> DSM 19592              | 2509276026 | Permanent<br>Draft | 4,508,243 | 4004 | EF660761 | seawater       |
| <i>Kordia algicida</i> OT-1                    | 641380434  | Permanent<br>Draft | 5,019,836 | 4584 | AY195836 | seawater       |
| <i>Kordia periserrulae</i> DSM 25731           | 2734482288 | Draft              | 4,725,576 | 4128 | GU233518 | polychaete     |
| <i>Kriegella aquimaris</i> DSM 19886           | 2622736525 | Draft              | 6,057,242 | 5014 | AB084262 | seawater       |
| <i>Lacinutrix</i> sp. Hel_I_90                 | 2582581868 | Permanent<br>Draft | 3,819,763 | 3506 | JX854138 | seawater       |
| <i>Lacinutrix venerupis</i> DOK2-8             | 2751185745 | Draft              | 3,192,399 | 2890 | CP019352 | seawater       |
| <i>Lutibacter maritimus</i> DSM 24450          | 2622736611 | Draft              | 3,484,703 | 3147 | FJ598048 | sediment       |
| <i>Maribacter arcticus</i> DSM 23546           | 2595698209 | Permanent<br>Draft | 4,211,145 | 3760 | AY771762 | sediment       |
| <i>Maribacter polysiphoniae</i> DSM 23514      | 2595698208 | Permanent<br>Draft | 5,129,962 | 4489 | AM497875 | algae          |
| <i>Maribacter spongiicola</i> DSM 25233        | 2731957517 | Draft              | 4,455,565 | 3894 | JX050191 | sponge         |
| <i>Maribacter vaceletii</i> DSM 25230          | 2734482098 | Draft              | 3,889,815 | 3392 | JX050190 | sponge         |
| <i>Muricauda antarctica</i> DSM 26351          | 2619619048 | Draft              | 4,482,831 | 4102 | JN166984 | seawater       |
| <i>Muricauda pacifica</i> DSM 25027            | 2731639122 | Draft              | 4,376,054 | 4153 | JN118551 | seawater       |
| <i>Muriicola jejuensis</i> DSM 21206           | 2724679820 | Draft              | 3,299,848 | 3040 | EU443206 | seawater       |
| <i>Nonlabens spongiae</i> JCM 13191            | 2751185769 | Draft              | 3,393,335 | 3097 | DQ064789 | sponge         |
| <i>Nonlabens ulvanivorans</i> DSM 22727        | 2593339289 | Permanent<br>Draft | 3,177,440 | 2918 | GU902979 | algae          |
| <i>Polaribacter haliotis</i> RA4-7             | 2788500510 | Draft              | 3,780,569 | 3361 | KX450477 | abalone        |
| <i>Polaribacter</i> sp. MED152                 | 638341218  | Finished           | 2,967,100 | 2723 | CP004349 | seawater       |

|                                                  |            |                    |           |      |              |            |
|--------------------------------------------------|------------|--------------------|-----------|------|--------------|------------|
| <i>Prochlorococcus marinus</i> MIT9515           | 640069324  | Finished           | 1,704,176 | 1968 | CP000552     | seawater   |
| <i>Psychroserpens</i> sp. Hel_I_66               | 2585427602 | Permanent<br>Draft | 3,842,990 | 3475 | JUGU01000001 | seawater   |
| <i>Pustulibacterium marinum</i> CGMCC<br>1.12333 | 2663762752 | Draft              | 4,209,902 | 3796 | FPBK01000031 | seawater   |
| <i>Robiginitalea myxolifaciens</i> DSM 21019     | 2636416043 | Draft              | 3,206,962 | 2897 | AB270585     | sediment   |
| <i>Roseobacter litoralis</i> Och 149             | 2510065042 | Finished           | 4,745,450 | 4577 | CP002623     | macroalgae |
| <i>Ruegeria pomeroyi</i> DSS-3                   | 637000267  | Finished           | 4,601,053 | 4355 | CP000031     | seawater   |
| <i>Sinomicrobium oceani</i> CGMCC 1.12145        | 2596583572 | Draft              | 5,026,272 | 4281 | FPJE01000054 | sediment   |
| <i>Synechococcus</i> sp. WH 8016                 | 2507262052 | Finished           | 2,706,690 | 3046 | AGIK01000004 | seawater   |
| <i>Tamlana sedimentorum</i> JCM 19808            | 2636415452 | Draft              | 3,961,353 | 3504 | AB894238     | sediment   |
| <i>Tenacibaculum adriaticum</i> DSM 18961        | 2756170228 | Draft              | 3,211,939 | 2987 | AM412314     | bryozoan   |
| <i>Tenacibaculum mesophilum</i> DSM 13764        | 2695420951 | Draft              | 3,286,619 | 3059 | AB032501     | sponge     |
| <i>Trichodesmium erythraeum</i> IMS101           | 637000329  | Finished           | 7,750,108 | 5156 | CP000393     | seawater   |
| <i>Winogradskyella arenosi</i> CECT 7958         | 2770939486 | Draft              | 3,675,157 | 3253 | AB438962     | sediment   |
| <i>Winogradskyella eximia</i> CECT 7946          | 2770939573 | Draft              | 4,242,526 | 3742 | AY521225     | algae      |
| <i>Winogradskyella jejuensis</i> DSM 25330       | 2695420983 | Draft              | 3,033,897 | 2864 | JF820844     | algae      |
| <i>Winogradskyella</i> sp. J14-2                 | 2751185740 | Draft              | 3,349,669 | 3049 | CP019388     | seawater   |
| <i>Zobellia galactanivorans</i> DsijT            | 2619619092 | Draft              | 5,521,712 | 4563 | AF208293     | algae      |

---
